# Supplementary material
Source: PubMed Central journal article supplement (PMC4908177)
Supplement: mmc1.pdf [file mmc1.pdf]

**Supplemental Data**

**A Common Variant at the 14q32 Endometrial Cancer Risk**

**Locus Activates *AKT1* through YY1 Binding**

**Jodie N. Painter, Susanne Kaufmann, Tracy A. O'Mara, Kristine M. Hillman, Haran Sivakumaran, Hatef Darabi, Timothy H.T. Cheng, John Pearson, Stephen Kazakoff, Nicola Waddell, Erling A. Hoivik, Ellen L. Goode, Rodney J. Scott, Ian Tomlinson, Alison M. Dunning, Douglas F. Easton, Juliet D. French, Helga B. Salvesen, Pamela M. Pollock, Deborah J. Thompson, Amanda B. Spurdle, and Stacey L. Edwards**

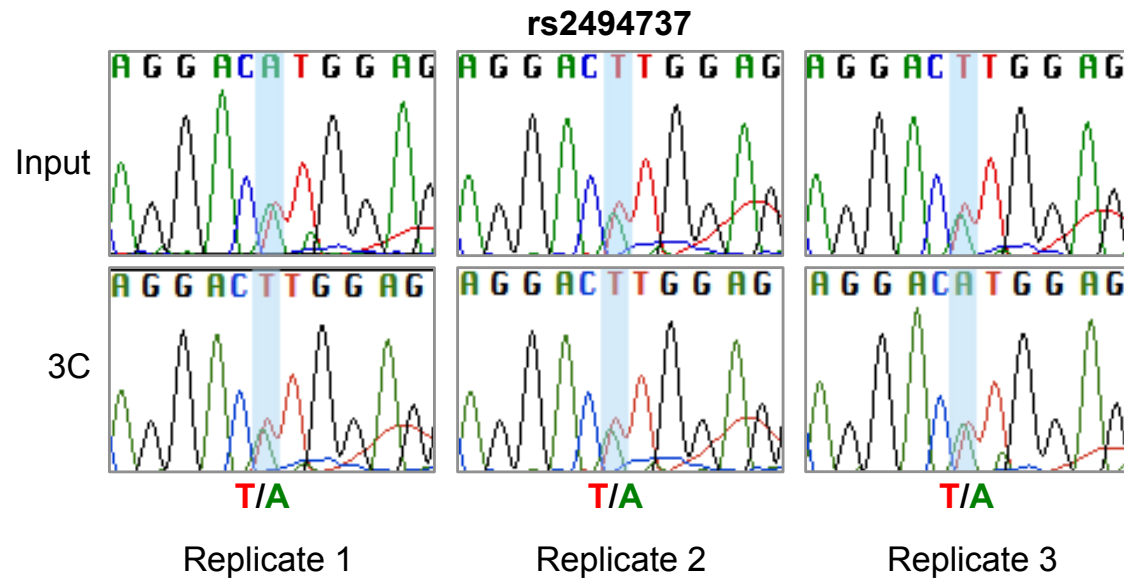

**Figure S1. Allele-specific 3C in Ishikawa endometrial cancer cell lines.** 3C followed by sequencing for the rs2494737-containing region in heterozygous Ishikawa endometrial cancer cells. Chromatograms represent three independent 3C libraries generated and sequenced. 3C libraries were generated with *NcoI*, with the anchor primer designed to incorporate the SNP into 3C PCR products.

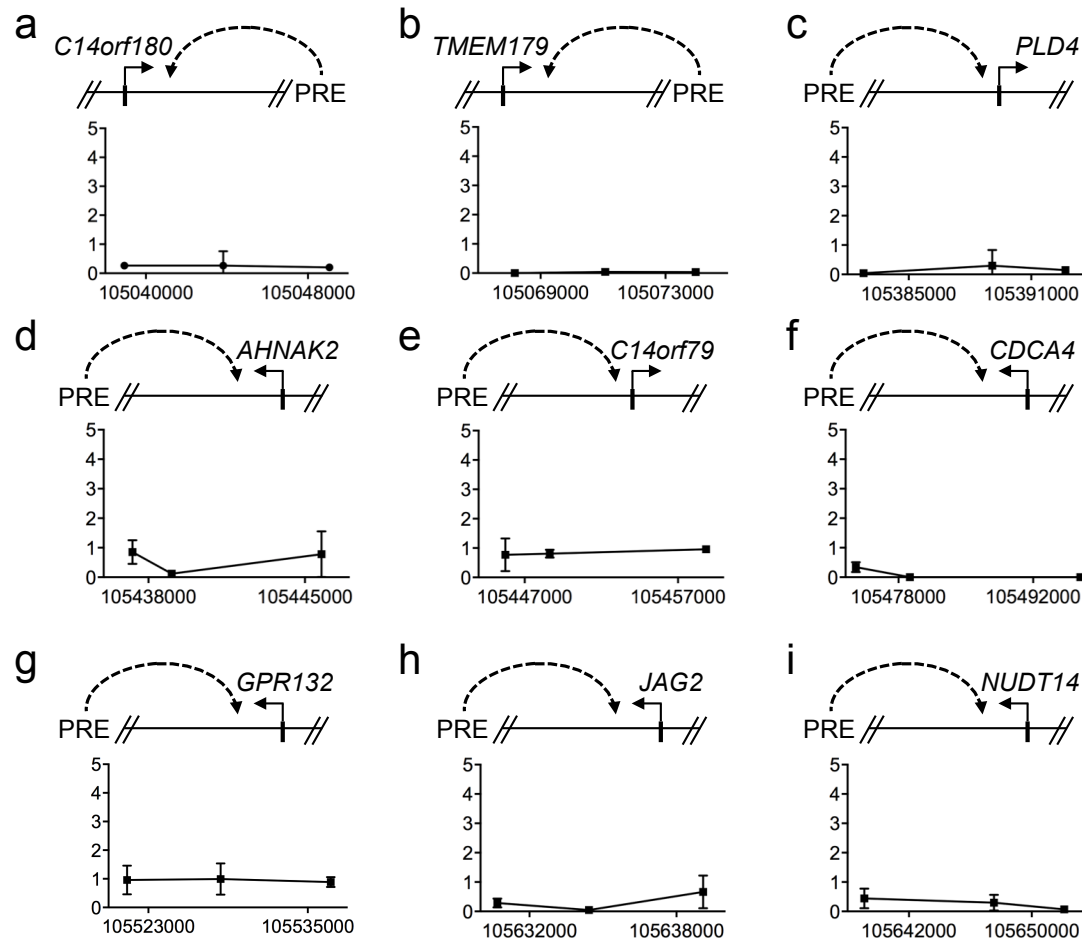

**Figure S2. Chromatin interactions at 14q32 in Ishikawa endometrial cancer cell lines.** 3C interaction profiles between the putative regulatory element (PRE; containing rs2498796, rs2498794 and rs2494737) and **(a) C14ORF180**, **(b) TMEM179**, **(c) PLD4**, **(d) AHNAK2**, **(e) C14ORF79**, **(f) CDCA4**, **(g) GPR132**, **(h) JAG2** and **(i) NUDT14** promoter regions. 3C libraries were generated with *Nco*I, with the anchor point set at the PRE. A physical map of the region interrogated by 3C is shown above. Graph represents three independent replicates. Error bars denote SD.

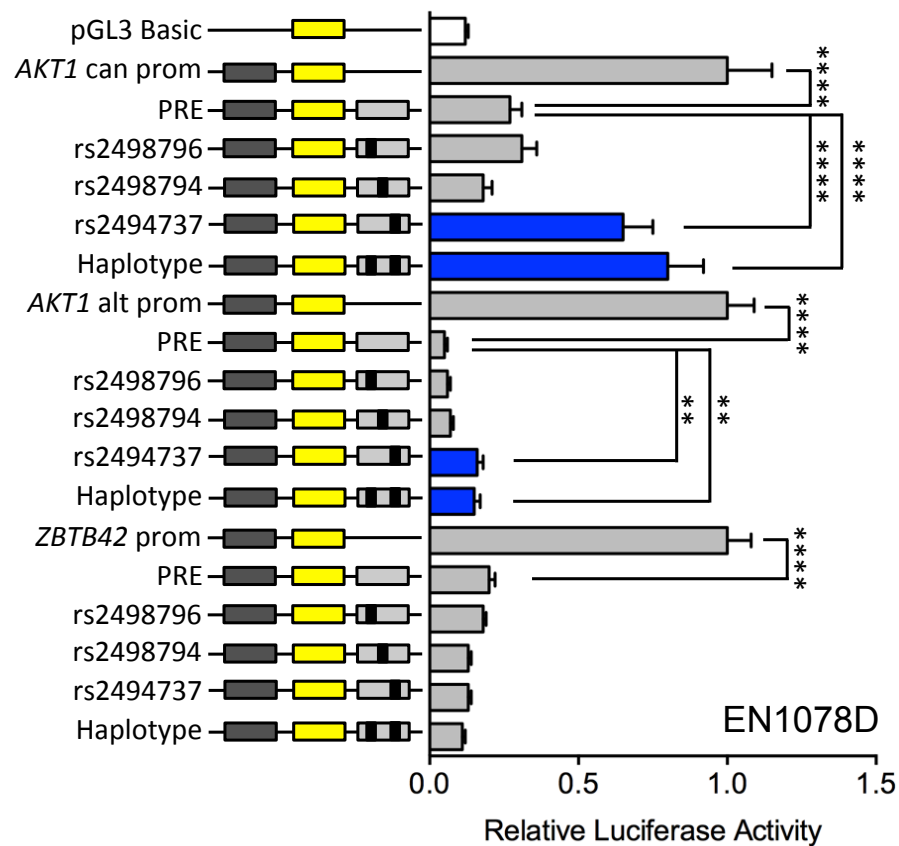

**Figure S3. Luciferase reporter assays in EN-1078D endometrial cancer cells.** The putative regulatory element (PRE) containing the major SNP alleles were cloned downstream of target gene promoter-driven luciferase constructs. *AKT1* can prom and *AKT1* alt prom denote a canonical and alternative *AKT1* promoter (prom) region, respectively. Minor SNP alleles were engineered into the constructs and are designated by the rs ID of the corresponding SNP. Haplotype denotes a construct that contains the minor alleles of rs2498796 and rs2494737. Error bars denote 95% confidence intervals from three independent experiments performed in duplicate. P-values were determined by 2-way ANOVA followed by Dunnett’s multiple comparisons test (\*\*P<0.01, \*\*\*\*P<0.0001).

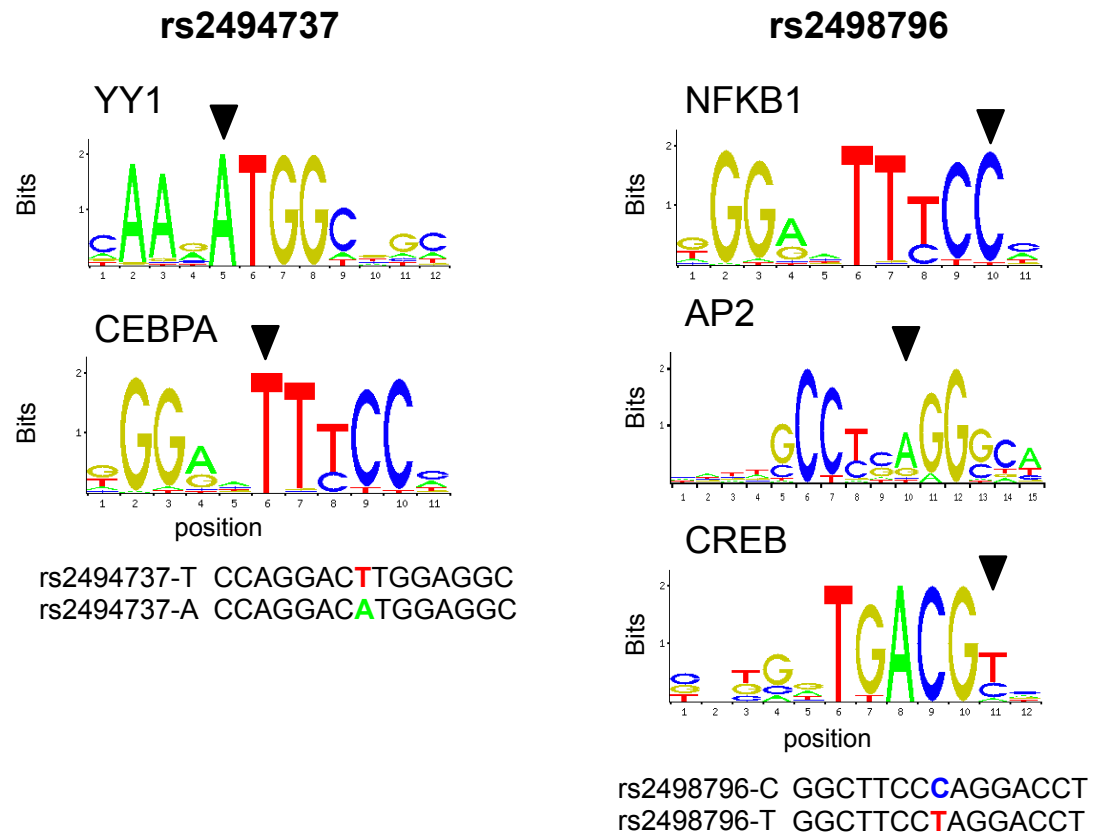

**Figure S4. Transcription factor binding.** Position weight matrix (PWM) of YY1, CEBPA, NFKB1, AP2 and CREB from JASPAR, with homology to the risk-associated alleles of rs2494737 and rs2498796 colored below. Predicted SNP changes are indicated by black arrowheads.

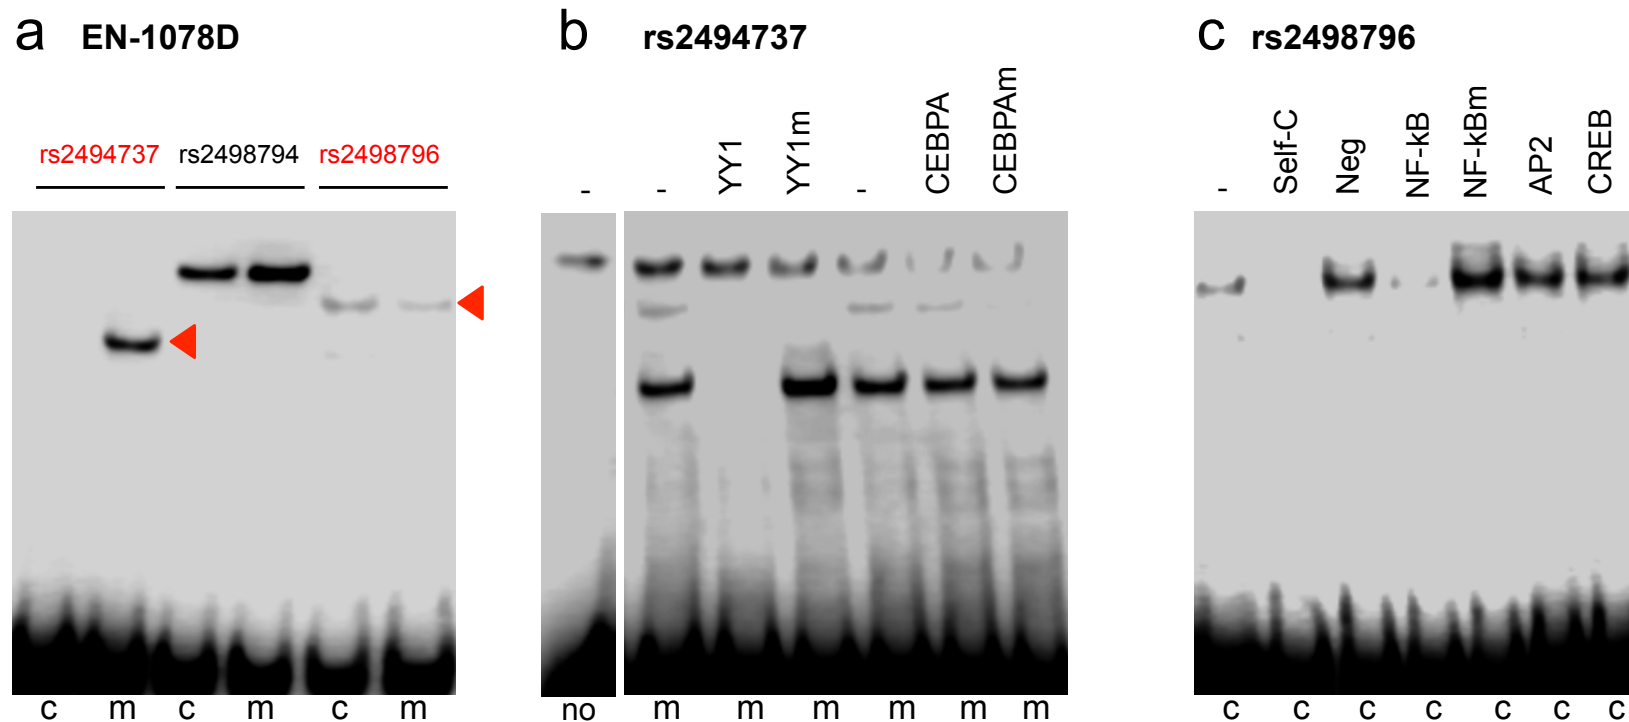

**Figure S5. EMSAs for candidate causal SNPs to detect allele-specific binding of nuclear proteins.** (a) Oligonucleotides were incubated with EN-1078D nuclear extracts. Red arrowheads show bands of different mobility or intensity detected between the common (c) and minor (m) alleles for the three candidate causal SNPs. Oligonucleotides for SNPs rs2494737 (b) and rs2498796 (c) were incubated with Ishikawa nuclear extracts. Competitor oligonucleotides are listed above each panel and were used at 100-fold molar excess: (no) no oligonucleotide; (-) no competitor; YY1 consensus binding site; YY1m, an identical oligonucleotide but with a mutated binding site (independent replicate of Figure 4a); CEBPA consensus binding site; CEBPAm, an identical oligonucleotide but with a mutated binding site; NF-kB consensus binding site; NF-kBm, an identical oligonucleotide but with a mutated binding site; AP2 and CREB consensus binding sites. Negative control (Neg) denotes a non-specific competitor.

**rs2494737**

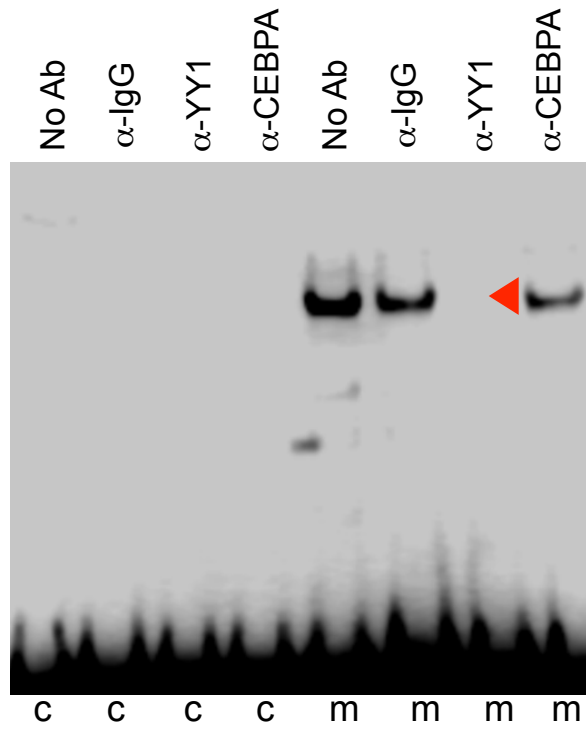

**Figure S6. EMSA-supershift for candidate causal SNP rs2494737.** Oligonucleotide duplexes for the common (c) or minor (m) alleles of SNP rs2494737 and antibodies against YY1 or CEPBA were incubated with Ishikawa nuclear extracts. Rabbit IgG was used as a negative control. The red arrowhead denotes the YY1 supershifted complex.

rs2494737 – YY1

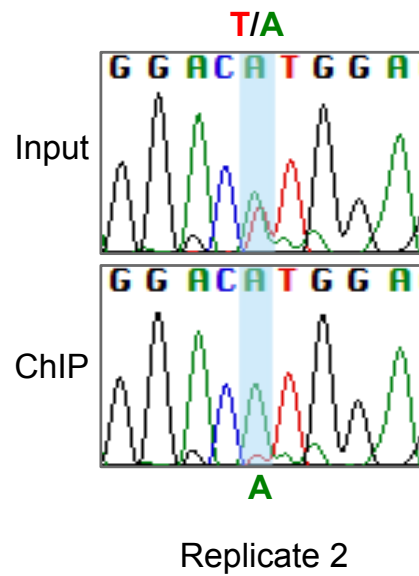

**Figure S7. YY1 transcription factor binding *in vivo*.** Sanger sequencing of the PCR fragment generated using primers flanking SNP rs2494737 in heterozygous Ishikawa endometrial cancer cells following YY1 ChIP-qPCR and the input DNA controls. Primers are listed in **Table S5**.



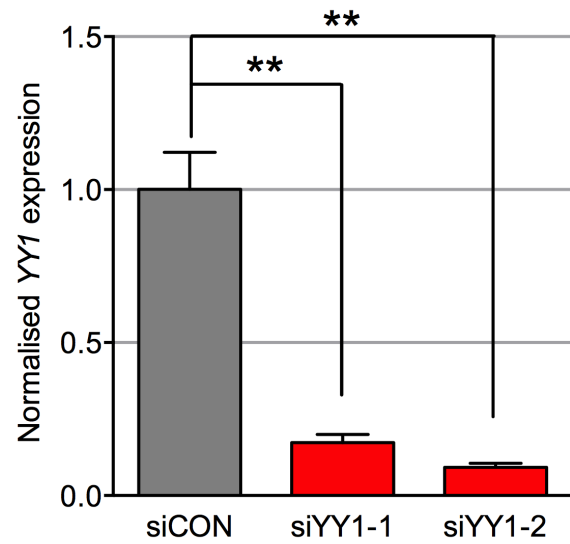

**Figure S8. TaqMan real-time PCR assays confirming knockdown of *YY1* in Ishikawa cells.** siCON is a nontargeting negative control and siYY1-1 and siYY1-2 are two independent siRNAs targeting *YY1*. Error bars denote the standard error of the mean from three experiments performed in duplicate. Statistical significance was determined by a paired t-test (\*\* $P < 0.01$ )

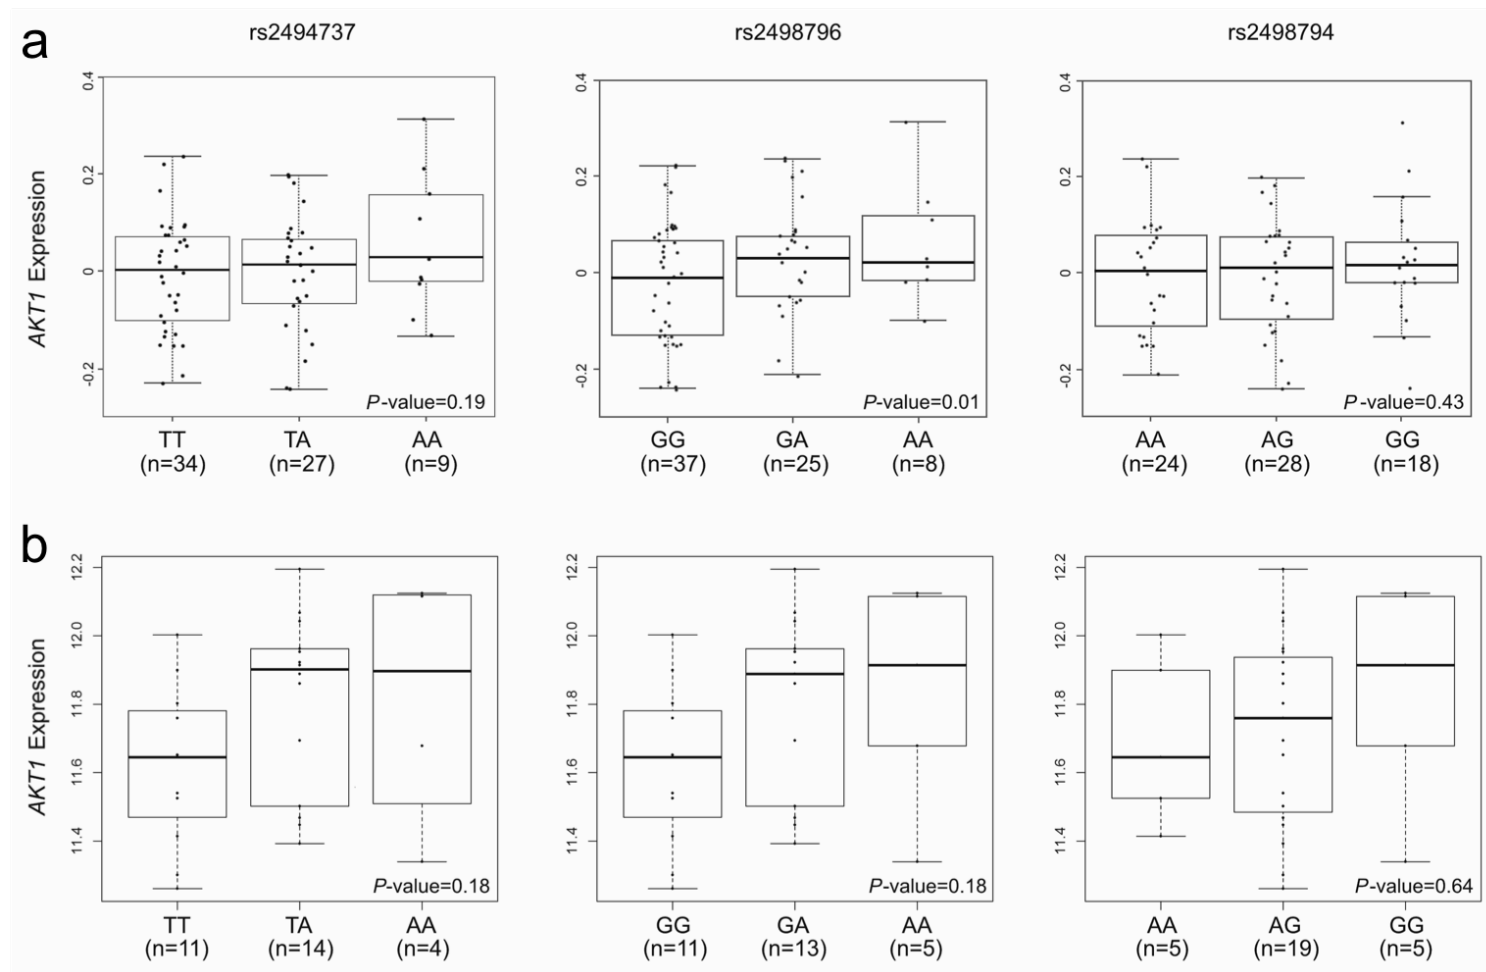

**Figure S9.** Associations of candidate causal SNPs with overall expression of *AKT1* in uterine samples from the **(A)** GTEx<sup>1</sup> database and **(B)** TCGA<sup>2</sup> dataset. The x-axis of each plot corresponds to the three observed SNP genotypes and the y-axis represents either log<sub>2</sub>-normalized gene expression values (GTEx) or RSEM gene expression values (TCGA). For the TCGA data, prior to the eQTL, analyses the expression data were adjusted to account for copy-number at the *AKT1* locus, and the three candidate SNPs were imputed with the following RSQR quality scores: rs2494737=0.57, rs2498796=0.72 and rs2498794=0.46.

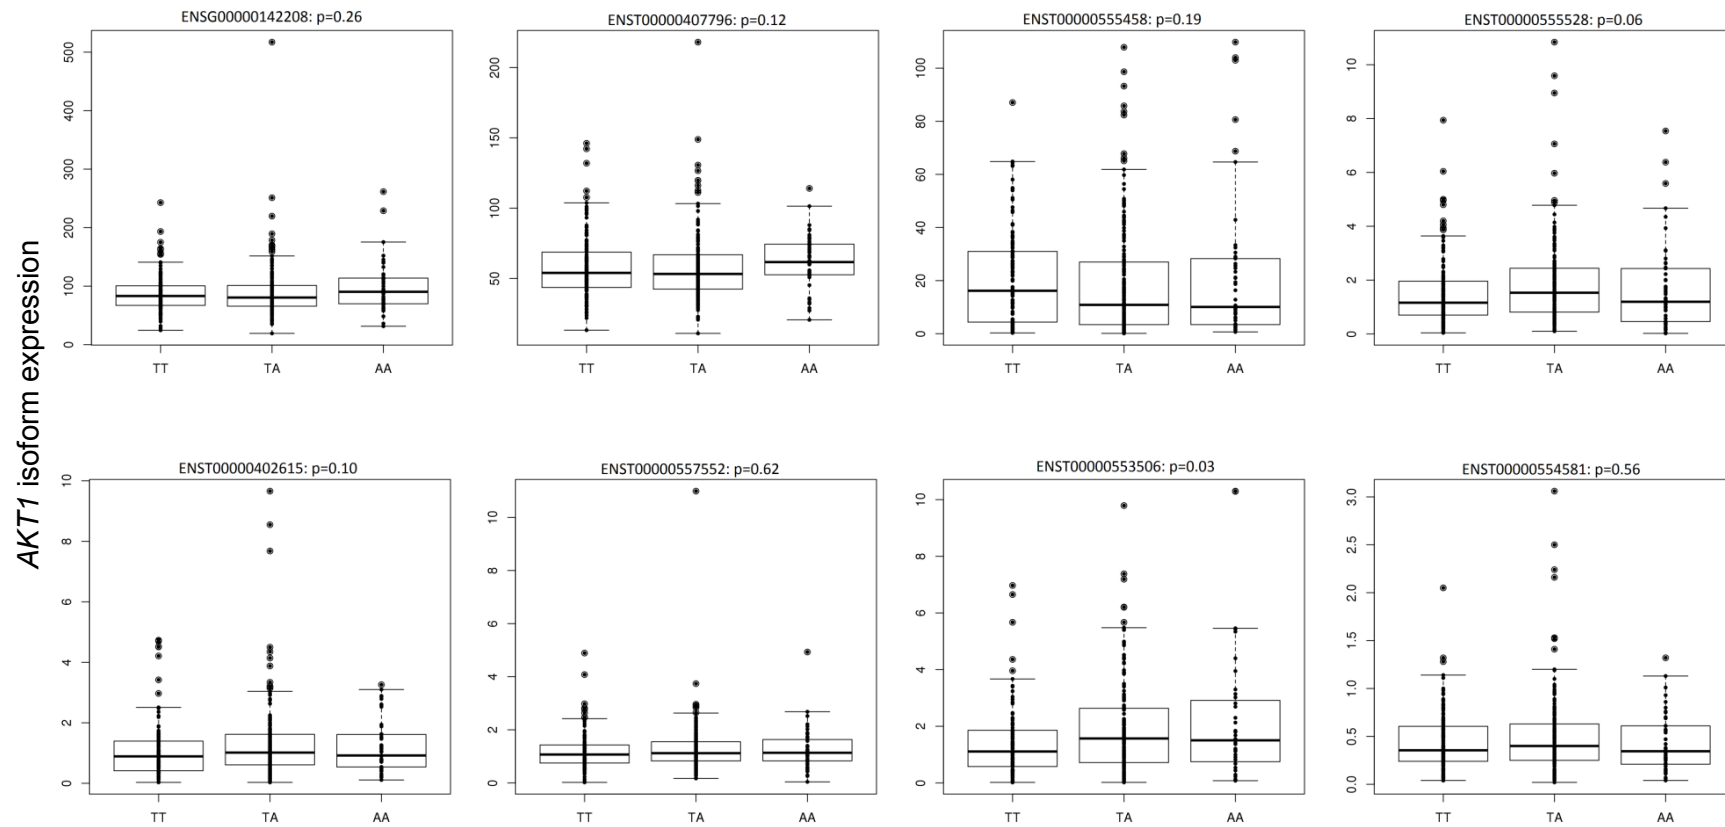

**Figure S10. Associations of SNP rs2494737 with expression of *AKT1* isoforms in endometrial tumour samples from the TCGA dataset.<sup>2</sup>** The x-axis of each plot corresponds to the three SNP genotypes and the y-axis represents the RSEM gene expression values for each isoform in 526 unique samples. Data was generated using single-read or paired-end RNA sequencing where SNP data was available. The main *AKT1* isoform is ENSG00000142208. Isoform ENST00000555380, corresponding to the ‘alt’ promoter examined in luciferase assays detailed above, was not expressed in the TCGA tumour or adjacent normal tissue datasets. Only isoforms for which expression was detected in >80% of samples are shown. Genotype at the risk SNP rs2494737 was not associated with differential expression for any isoform once multiple testing was taken into account (where the Bonferroni corrected  $P$ -value for a significant association was  $0.05/8$  transcripts=0.006). Results for SNP rs2494737 in adjacent normal tissue, and for SNPs rs2498794 and rs2498796 in tumour and adjacent normal tissue were all not significant (data not shown).

**Table S1.** Oligonucleotides used in 3C assays.

| <b>3C Primer (<i>NcoI</i>)</b> | <b>Sequence (5' to 3')</b>         |
|--------------------------------|------------------------------------|
| PRE bait                       | CGCTACAGGTAAGGAATAAAGCCACAGCAGG    |
| Allele-specific PRE bait       | CCTTAGGACTCAGCCTGGAGACTCCCACC      |
| Fragment 1                     | GCTGGCAGAGAGAAGCTGTGTATAAGCCTGG    |
| Fragment 2                     | CCTGTGTGCACATAGCTCAGGGTTCTGC       |
| Fragment 3                     | GCACAGTGTCTGGTTTCCTCCACTCAGC       |
| Fragment 4                     | GCTGAGAAGTGGAGTGGGATAAGACGATGATAGG |
| Fragment 5                     | GGTGTGGGCGTTCTGAGAGAAATCCTCC       |
| Fragment 6                     | TGCACAGACATGAGTGGCCTGAGAACG        |
| Fragment 7                     | CAGTCTCACCCCTGAATCAGAGCCGTCC       |
| Fragment 8                     | GGAGGATTCTGGTGACGAGCTCCTGG         |
| Fragment 9                     | TGACACATGCTGGAGGCTCAAAGGAGC        |
| Fragment 10                    | GAGCTCCCACACTGTGCTGTGGAAGG         |
| Fragment 11                    | ATGTAGGCATTCGGATGGAGGTGCTGG        |
| Fragment 12                    | GCCTCTGCTCGTGTTCCTGCCTTTGC         |
| Fragment 13                    | ACCAGGAGGTCTTTGCCTCCCTGTTCC        |
| Fragment 14                    | GTGAGCTGCTCCCCGGTGTCTGC            |
| Fragment 15                    | CACTTCCTCCAGGGTGCATTCCTGG          |
| Fragment 16                    | GACGCGCACACAAGTTCCATGTGC           |
| Fragment 17                    | GACAGAGCACA ACTCTATGTGGGCGTCC      |
| Fragment 18                    | GTTGAGGTT CAGGCTCTTCTTGGCATCG      |
| Fragment 19                    | GTTTAGCCACTACTTGTCTGTGGCCTTGTGG    |
| Fragment 20                    | GCAGGGTTTCCCCACGTAGTCATGG          |
| Fragment 21                    | GACACGTT CAGCACCATGAAGGCTTTCC      |
| Fragment 22                    | CATGTCCCCAGGAAGTCTGTGAGGAGACC      |
| Fragment 23                    | CTGCCAGTGTCCACCACAGCTCTGC          |
| Fragment 24                    | GTTGATGTGATGGCCAAGTTTCAGCTGC       |
| Fragment 25                    | GCTGCACCTGAATCACTAACTCAGTGTGAGC    |
| Fragment 26                    | ATCAGGTTCTTGCTTCAGAGCAGGGAGG       |
| Fragment 27                    | CGAGGAGGCCAGACCTGCTTTGTCC          |
| Fragment 28                    | CACATCACATCGTCTGCCTGTCTGTGC        |

---

|             |                                   |
|-------------|-----------------------------------|
| Fragment 29 | AGACATGCAGTCCGCTAACGCTGTGG        |
| Fragment 30 | CACTCAAGGCAGGTGTTCTGCACCATCC      |
| Fragment 31 | GCACTCACTCTGTCTTTCCTGCCTCATGG     |
| Fragment 32 | GATTCCCACAGCAAAGGCATCCAAGG        |
| Fragment 33 | AGGTAGGGAAACTGAGAGAAGGGAAGCCTATCC |
| Fragment 34 | GCAGGAAACAAGGCCAAAGAGGCACC        |
| Fragment 35 | GAACACCCTTGGGGGCACACCTGATACTAGG   |
| Fragment 36 | GGCTTGAGAGGGTGCAGGGATACATATCG     |
| Fragment 37 | GGATCCGTGACCCTCACTTTCCTTGTGC      |
| Fragment 38 | ACGTGCACTTTCACCCACAGCACAGC        |
| Fragment 39 | TGCCTCCGGTGTGAAGAGGTGATGC         |
| Fragment 40 | GTGTGATTTACCTGGTGCCGCTTGTGC       |
| Fragment 41 | GAAGTGGCTCCATAGACCCAAAGCAAGC      |
| Fragment 42 | GCAGAAAGTAGGTAGAGGCCAGGAGGAAATGG  |
| Fragment 43 | GGTCTGTCTCATTCACTGCCCTACCCAGG     |
| Fragment 44 | AAGCAGCATCCTCAGAGCAGCTGGTCC       |
| Fragment 45 | TCCTCACGTGTGCACATCACCTTATAGTCACC  |
| Fragment 46 | CACACAAGCCACTGTCACCTGCTGTGC       |
| Fragment 47 | CCACCCGCTGCACATGTTTCAGACC         |
| Fragment 48 | GACCCTTAACCCTGTGACACTGCACCTATCC   |
| Fragment 49 | GGACCACATGGACAGTCACAGGCAGC        |
| Fragment 50 | AGGTGACCCTCAGAGGCAGATCATGACC      |
| Fragment 51 | AGTGCTGGCCTCTCAATCCCTGACACC       |
| Fragment 52 | GGAAGTCCCGTTGGAGATGAGGAAGTAAGG    |
| Fragment 53 | GCCTTCCAGGAAAGCCAGGAGAGAGG        |
| Fragment 54 | CCCTAACCTGATGCACCAGCTGACAGG       |
| Fragment 55 | GTTGGCCAAATGAATGAACCAGATTCAGACC   |
| Fragment 56 | GTTGTGGTCTCCACATTCTATTCATGTTGAGG  |
| Fragment 57 | CAGCTGACTGCTAGAGCTGTCGTGGAAGC     |
| Fragment 58 | CAATCCTGGCTGTCCCAGCTCTCAGG        |
| Fragment 59 | CTCACTCAGTGGAGCTTCAGTATCTGCACTTCC |
| Fragment 60 | GGATGAACCCACACATTCCCTTCACTGC      |
| Fragment 61 | CTAATTCAGATGGCAATTTGATCACTGCTGTCC |

---

---

|             |                                  |
|-------------|----------------------------------|
| Fragment 62 | GACATCACACCATGTTCTGGCTGTAAGAATGG |
| Fragment 63 | AGTGTGGGTGAGCACTGTCCAATCTGAGG    |
| Fragment 64 | TCGGAGCTGTGTTGTGAGCCACTAGTAATCC  |
| Fragment 65 | ATCTAGGCTCAAGTGGTGGCTGTTGGTGG    |
| Fragment 66 | CGTAGGCTTTGAAGATGCTTGTTTCAGAAACG |
| Fragment 67 | AGAAGGGATGATATGCTCGGAATAACTGGAGG |
| Fragment 68 | TTCCACTATGACCCTCAGCGAGTGTTTTCC   |
| Fragment 69 | TGAGATGTGCATGGCTGCTGGAATGG       |
| Fragment 70 | AGGAAAGGCTTTGAGGCAGGTGGTCC       |
| Fragment 71 | CACTCCCTCACTCCATTCATACCTCCACTTCC |
| Fragment 72 | GCTGTAGAGGCCTCCTGGAGGCTTTGC      |
| Fragment 73 | CACGCCCAAGGTCTTCAGCTTTGAGG       |
| Fragment 74 | CCGAGTTTCTGCACCTGTCAGTGGAGC      |
| Fragment 75 | GAGAAGCCTCTAGGGCAGGTGCACAGG      |
| Fragment 76 | CTCGACTGTTCCCAAGGGCTCATGG        |
| Fragment 77 | CCAGGACTTCATGGCCCAGTGTCTGC       |
| Fragment 78 | TCAGAGGGGACAGAGATGAGTCTGATGACG   |

---

|             |                                  |
|-------------|----------------------------------|
| C14ORF180F1 | CAACATAACATGACTGGCTGTGGCACTGG    |
| C14ORF180F2 | CCAGCCTAGCAGGAATGGATTCGTTACTCC   |
| C14ORF180F3 | GTGTAACCTGGAGGCCTCGTGACAGATGG    |
| TMEM179F1   | GGTTTGGCAACATGGGTGCAGATGACG      |
| TMEM179F2   | GGATTAGTGGTCTCATGGATTAATGGGTTGCC |
| TMEM179F3   | GCCTTTGTAAGCACATGTTGATCAGTCACTGG |

---

|            |                                    |
|------------|------------------------------------|
| PLD4F1     | GGAAAGCTTCCTGCATAATCACAGCTTCATTACC |
| PLD4F2     | CCAGAGAGTCACACAGCCTCCAGCTAGTCC     |
| PLD4F3     | GCTCTTATCTGCCTCCTGTGGCAAGTGC       |
| AHNAK2F1   | ACAGGAAGGAGACGCTGGCACAGAGC         |
| AHNAK2F2   | GAGGTGCCACTTAAGGCTCCAAGCAGG        |
| AHNAK2F3   | CCTCTGTGTGGTGCCCAAGCTAGATCC        |
| C14ORF79F1 | CCTCTGTGTGGTGCCCAAGCTAGATCC        |
| C14ORF79F2 | CTGAGACAGTCCTAGATGCTCCCACCTCACC    |

---

|            |                                       |
|------------|---------------------------------------|
| C14ORF79F3 | GTAGGAGGTAACAAGGACCTGAGACTGAGCTGG     |
| CDCA4F1    | GCCTTAGGGATCACACCCATTCCTTGG           |
| CDCA4F2    | CGAGACCAGCCTGGACAACATAGTGAGACC        |
| CDCA4F3    | GCTGGTCTCAAACCTCCTGAACTCAAGTGATCC     |
| GPR132F1   | CAGGGGACTCTGTTCTTGATCTGCTCTGAGG       |
| GPR132F2   | CAACAGTCAACCTGTCCTAGGAGGGACCAGGAGAGC  |
| GPR132F3   | GGCAAGCTGAATCCCTCACCGTAAACC           |
| JAG2F1     | ACACCTTCCCAGTAGGGACCAGGAGAGC          |
| JAG2F2     | GAACATACTTTCCTGCAGCGTGCAGC            |
| JAG2F3     | GGAAGCAGTGACCCTGACCTGAGATGG           |
| NUDT14F1   | GGAAGCAGTGACCCTGACCTGAGATGG           |
| NUDT14F2   | GGAAGCTGTCCTGGCAGGAGGAGACC            |
| NUDT14F3   | GCTCCCTGCTCAGCGACCTCACCTGTCAGCGTGCAGC |

**Table S2.** Oligonucleotides used in EMSAs.

| SNP       | allele <sup>a</sup> | Sequence (5' to 3') <sup>b</sup>               |
|-----------|---------------------|------------------------------------------------|
| rs2498796 | com                 | <sup>BIO</sup> CACCCACCAGGTCCTGGGAAGCCCCATCTCT |
|           | min                 | <sup>BIO</sup> CACCCACCAGGTCCTAGGAAGCCCCATCTCT |
| rs2498794 | com                 | <sup>BIO</sup> AGACCTGCCTGAGACAGATCCCAGAGGCCTG |
|           | min                 | <sup>BIO</sup> AGACCTGCCTGAGACGGATCCCAGAGGCCTG |
| rs2494737 | com                 | <sup>BIO</sup> TTGCCAGCCCAGGACTTGGAGGCTCCAGGGG |
|           | min                 | <sup>BIO</sup> TTGCCAGCCCAGGACATGGAGGCTCCAGGGG |

<sup>a</sup> com: common allele, min: minor allele

<sup>b</sup> BIO: 5' biotinylation (present on both the sense and antisense strands of the duplex)

**Table S3.** EMSA competitor duplexes and their target DNA binding proteins.

| <b>Competition Target</b>  | <b>Sequence (5' to 3')</b>  |
|----------------------------|-----------------------------|
| YY1 consensus FOR          | CGCTCCCCGGCCATCTTGGCGGCTGGT |
| YY1 consensus REV          | ACCAGCCGCCAAGATGGCCGGGGAGCG |
| YY1 mutated FOR (YY1m)     | CGCTCCGCGATTATCTTGGCGGCTGGT |
| YY1 mutated REV (YY1m)     | ACCAGCCGCCAAGATAATCGCGGAGCG |
| NFkB consensus FOR         | AGTTGAGGGGACTTTCCCAGGC      |
| NFkB consensus REV         | GCCTGGGAAAGTCCCCTCAACT      |
| NFkB mutated FOR (NFkBm)   | AGTTGAATTGACTTTGCCAGGC      |
| NFkB mutated REV (NFkBm)   | GCCTGGCAAAGTCAATTCAACT      |
| AP2 consensus FOR          | GATCGAACTGACCGCCCGCGGCCCGT  |
| AP2 consensus REV          | ACGGGCCGCGGGCGGTCAGTTCGATC  |
| CEBP consensus FOR         | TGCAGATTGCGCAATCTGCA        |
| CEBP consensus REV         | TGCAGATTGCGCAATCTGCA        |
| Negative Control FOR (Neg) | TGCAGAGACTAGTCTCTGCA        |
| Negative Control REV (Neg) | TGCAGAGACTAGTCTCTGCA        |

**Table S4.** Oligonucleotides used in cloning luciferase constructs.

| <b>Primer</b>        | <b>Sequence (5' to 3')</b>                |
|----------------------|-------------------------------------------|
| AKT CAN promoter FOR | <u>ACGCGT</u> GTCACTTTACAGACGGGGAAACTGAGG |
| AKT CAN promoter REV | AGATCTGGAAATGCCCAAGTACTTAGCAGG            |
| AKT ALT promoter FOR | <u>ACGCGT</u> TCTAGGTGGCTTCAGTGTGAGACC    |
| AKT ALT promoter FOR | AGATCTATGGGGACAGCACACAGTGC                |
| ZBTB42 promoter FOR  | <u>ACGCGT</u> AGGGCTGTGATCCAGGCAGG        |
| ZBTB42 promoter REV  | AGATCTCCGAGCTCCTCTCCGGTCG                 |
| PRE WT FOR           | <u>GGATCC</u> CTCAAGAATGATGGCACCTTCATTGG  |
| PRE WT REV           | GTCGACGTGAGTGGAGTGTGTAGCCGCTGG            |



**Table S5.** Oligonucleotides used for ChIP analyses.

| Primer name     | Sequence (5' to 3')      |
|-----------------|--------------------------|
| SNPrs2494737FOR | AGGACTCAGCCTGGAGACTCC    |
| SNPrs2494737REV | TCTCGGGATTCAGATTTGGG     |
| SNPrs2498796FOR | TTCATCAGCTGGCACTCTGC     |
| SNPrs2498796REV | GTAGAGTGTCTGAGCTGGAACAGG |
| NegControlFOR   | CACAACAGGATCTTATGCGTGG   |
| NegControlREV   | CAGTCCCTGCTCATGATCTTGC   |

**Table S6.** Numbers of SNPs included in the *AKT1* fine-mapping region on chromosome 14 (bases 104,743,220-105,743,220) compared to SNPs present in the 1000Genomes 2012 reference panel. Linkage disequilibrium was calculated to the top hit previously published for this locus, which was drawn from a subset of risk SNPs selected on the basis of info score >0.9.<sup>3</sup>

| SNP category                                                         | 1000Genomes 2012 release | <i>AKT1</i> fine-mapping region | % of 1000G SNPs included in the fine-mapping dataset |
|----------------------------------------------------------------------|--------------------------|---------------------------------|------------------------------------------------------|
| SNPs with MAF $\geq$ 1% in the 1000Genomes 2012 release <sup>a</sup> | 3813                     | 2922                            | 76.6%                                                |
| LD to rs2498796:                                                     |                          |                                 |                                                      |
| $\geq$ 0.8                                                           | 26                       | 26                              | 100%                                                 |
| 0.6-0.799                                                            | 31                       | 30                              | 96.7%                                                |
| 0.4-0.599                                                            | 16                       | 16                              | 100%                                                 |
| 0.2-0.399                                                            | 18                       | 17                              | 94.4%                                                |
| <0.2/NA                                                              | 3721                     | 2832                            | 76.1%                                                |

<sup>a</sup> Minor allele frequencies (MAF) calculated for Europeans only (85 CEU individuals)

**Table S7.** See excel file.

**Table S8.** Predicted effects of candidate casual variants on transcription factor binding motifs.

| <b>rsID</b> | <b>Position<br/>(hg19; chr14)</b> | <b>TFBS<sup>a</sup></b> | <b>Motif<br/>change<sup>b</sup></b> |
|-------------|-----------------------------------|-------------------------|-------------------------------------|
| rs2494737   | 105246325                         | YY1                     | ++                                  |
|             |                                   | CEBPA                   | +                                   |
| rs2498796   | 105243220                         | NF-kappaB               | -                                   |
|             |                                   | AP2                     | -                                   |
|             |                                   | CREB                    | -                                   |
| rs2498794   | 105245251                         | BCL                     | --                                  |
|             |                                   | GATA1                   | -                                   |
|             |                                   | AP1                     | +                                   |

<sup>a</sup> Altered transcription factor binding site (TFBS) determined by HaploRegv3<sup>4</sup> or AliBaba2<sup>5</sup> (TRANSFAC and JASPAR matrices).

<sup>b</sup> Degree of change to motif for minor allele: + increased agreement with consensus, - decreased.

## Supplementary References

1. GTEx Consortium (2013). The Genotype-Tissue Expression (GTEx) project. *Nat Genet* 45, 580-585.
2. Cancer Genome Atlas Research, N., Kandoth, C., Schultz, N., Cherniack, A.D., Akbani, R., Liu, Y., Shen, H., Robertson, A.G., Pashtan, I., Shen, R., et al. (2013). Integrated genomic characterization of endometrial carcinoma. *Nature* 497, 67-73.
3. Cheng, T., Thompson, D.J., O'Mara, T.A., Painter, J.N., Glubb, D.M., Flach, S., Lewis, A., French, J.D., Freeman-Mills, L., Church, D., et al. (2016). Five endometrial cancer risk loci identified through genome-wide association analysis. *Nat Genet* (under re-review).
4. Ward, L.D. and Kellis, M. (2015). HaploReg v4: systematic mining of putative causal variants, cell types, regulators and target genes for human complex traits and disease. *Nucleic Acids Res* (doi: 10.1093/nar/gkv1340).
5. Grabe, N. (2002). AliBaba2: context specific identification of transcription factor binding sites. *In Silico Biol* 2, S1-15.
